# Supplementary material for: Reaction Mechanisms and Rate Constants of Auto‐Catalytic Urethane Formation and Cleavage Reactions
Source: PubMed Central journal article supplement — ChemistryOpen. 2021 Mar 3;10(5):534–44. doi: 10.1002/open.202000150 (PMC8095315; doi:10.1002/open.202000150), 2021-03-03
Supplement: OPEN-10-534-s001.pdf [file OPEN-10-534-s001.pdf]

# ChemistryOpen

Supporting Information

## Reaction Mechanisms and Rate Constants of Auto-Catalytic Urethane Formation and Cleavage Reactions

Christoph Gertig, Eric Erdkamp, Andreas Ernst, Carl Hemprich, Leif C. Kröger, Jens Langanke, André Bardow, and Kai Leonhard\*

# Experimental Setup and Details on HPLC Measurements

## High pressure chromatography method:

For quantitative HPLC analysis an Agilent Technologies series 1200 with UV detector and a chromatographic column of the model Water Symmetry Shield RP 18 was used. Separation of the substances was achieved using the following method. Mobile phase: methanol/water (60/40, vol./vol.) for two minutes changing to methanol/water (70/30, vol./vol.) for another 13 minutes and finishing with methanol/water (90/10, vol./vol.) within another 15 minutes. The samples were diluted in methanol. Flow rate: 0.7 ml/min; column temperature: 40 °C, wavelength of detection: 256 and 260 nm.

## Experimental setup:

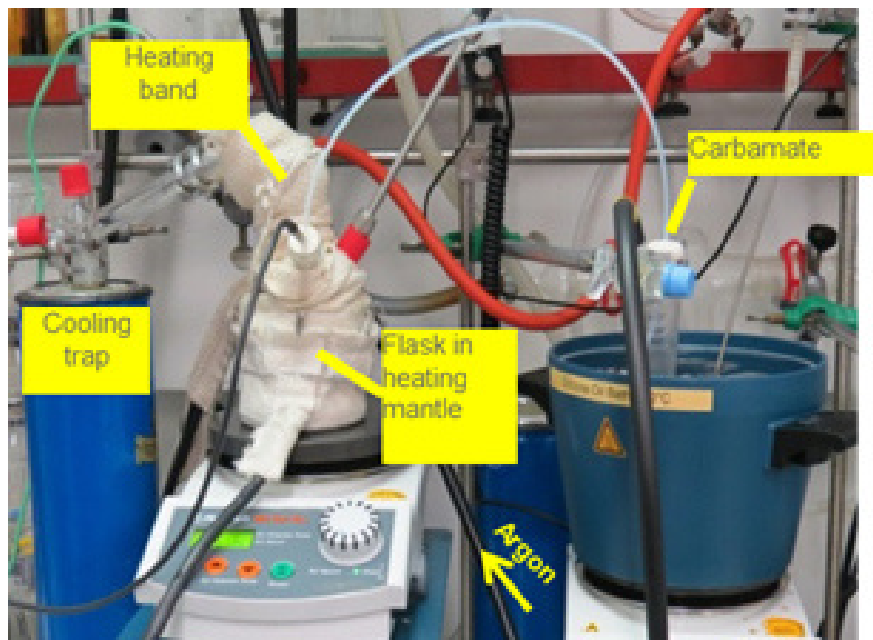

Figure 1: Setup for urethane cleavage experiment.

# Experimental Data from the Urethane Cleavage Experiment

| $T = 220\text{ }^{\circ}\text{C}$ |                                          |
|-----------------------------------|------------------------------------------|
| $t$ in s                          | $c_{\text{carb}}$ in $\text{mol l}^{-1}$ |
| 0                                 | 1,065655971                              |
| 300                               | 1,055600366                              |
| 450                               | 1,046590785                              |
| 600                               | 1,040945452                              |
| 1200                              | 0,986461768                              |
| 1800                              | 0,97559329                               |
| 3600                              | 0,894210804                              |
| 5400                              | 0,833302076                              |
| 7200                              | 0,797802034                              |

## Details on Conformer Treatment

### Conformer Treatment for Reactants

In case of several relevant reactant conformers  $\tilde{i}$ , the Gibbs free energy  $G_i$  of a reactant  $i$  in solution is calculated considering all these conformers. For this purpose, the Gibbs free energy  $G_i^{\text{i.G.}}$  in the ideal gas reference state is calculated as follows:

$$G_i^{\text{i.G.}} = \sum_{\tilde{i}} \left[ G_{\tilde{i}}^{\text{i.G.}} \frac{\exp\left(-\frac{G_{\tilde{i}}^{\text{i.G.}} - G_0^{\text{i.G.}}}{RT}\right)}{\sum_{\tilde{i}} \exp\left(-\frac{G_{\tilde{i}}^{\text{i.G.}} - G_0^{\text{i.G.}}}{RT}\right)} \right] - RT \sum_{\tilde{i}} \left[ \frac{\exp\left(-\frac{G_{\tilde{i}}^{\text{i.G.}} - G_0^{\text{i.G.}}}{RT}\right)}{\sum_{\tilde{i}} \exp\left(-\frac{G_{\tilde{i}}^{\text{i.G.}} - G_0^{\text{i.G.}}}{RT}\right)} \ln \left( \frac{\exp\left(-\frac{G_{\tilde{i}}^{\text{i.G.}} - G_0^{\text{i.G.}}}{RT}\right)}{\sum_{\tilde{i}} \exp\left(-\frac{G_{\tilde{i}}^{\text{i.G.}} - G_0^{\text{i.G.}}}{RT}\right)} \right) \right].$$

Here,  $G_{\tilde{i}}^{\text{i.G.}}$  denotes the Gibbs free energy of a conformer  $\tilde{i}$  in the ideal gas reference state and  $G_0^{\text{i.G.}}$  the Gibbs free energy of the most stable conformer. The sums run over all relevant conformers of reactant  $i$ . The second term in the equation accounts for the entropy of ideal mixing.

Accordingly, all relevant conformers are considered in the calculation of the solvation free energy  $\Delta G_i^{\text{solv}}$  of reactant  $i$  with COSMO-RS.<sup>1-3</sup>

## Treatment of Transition State Conformers

As already outlined in the manuscript, the conformers of transition states (TS) are treated by computing individual rate constants  $\tilde{k}$  for reaction via the individual TS conformers. Subsequently, the contributions are summed up in the calculation of the rate constant  $k$ :

$$k = \sum \tilde{k} \quad (1)$$

The sum runs over all TS conformers. This treatment is discussed more detail elsewhere.<sup>4</sup>

## Molecular Geometries and Energies Obtained from Quantum Chemical Calculations

|                                        |                     |             |             |
|----------------------------------------|---------------------|-------------|-------------|
| MeOH                                   |                     |             |             |
| $E_{\text{DLPNO-CCSD(T)/aug-cc-pVTZ}}$ | = -115.561994892551 |             |             |
| C                                      | 0.66662900          | 0.02005800  | -0.00001100 |
| H                                      | 1.03385300          | 0.54509200  | 0.89023000  |
| H                                      | 1.08470800          | -0.98599200 | 0.00217000  |
| H                                      | 1.03427100          | 0.54161100  | -0.89218000 |
| O                                      | -0.75049100         | -0.12191400 | -0.00003000 |
| H                                      | -1.14867700         | 0.75425300  | 0.00009000  |

## PhenylNCO

$$E_{\text{DLPNO-CCSD(T)/aug-cc-pVTZ}} = -399.063149242343$$

|   |             |             |             |
|---|-------------|-------------|-------------|
| C | 0.09126300  | -0.25261600 | -0.00073700 |
| N | 1.44738200  | -0.58326000 | -0.00155300 |
| C | 2.53680600  | -0.08079500 | 0.00003600  |
| O | 3.64380100  | 0.30016900  | 0.00142500  |
| C | -0.84451100 | -1.28764900 | -0.00008300 |
| C | -2.20179100 | -0.99089200 | 0.00065300  |
| C | -2.63465800 | 0.33187800  | 0.00069200  |
| C | -1.69792400 | 1.36205900  | -0.00002400 |
| C | -0.33857300 | 1.07802200  | -0.00077400 |
| H | -0.49575900 | -2.31172100 | -0.00013800 |
| H | -2.92338800 | -1.79829300 | 0.00118400  |
| H | -3.69303000 | 0.55910000  | 0.00128400  |
| H | -2.02523200 | 2.39439100  | -0.00002900 |
| H | 0.39165600  | 1.87795800  | -0.00140400 |

## MPCtrans

$$E_{\text{DLPNO-CCSD(T)/aug-cc-pVTZ}} = -514.667401361183$$

|   |             |             |             |
|---|-------------|-------------|-------------|
| C | 3.48738000  | 0.31429000  | 0.00129800  |
| C | 2.53177000  | 1.32434400  | 0.00045500  |
| C | 1.17132000  | 1.03336500  | -0.00076200 |
| C | 0.75491800  | -0.30147300 | -0.00107300 |
| C | 1.71540000  | -1.32044600 | -0.00026600 |
| C | 3.06820800  | -1.01302700 | 0.00092800  |
| H | 4.54258300  | 0.55584600  | 0.00221500  |
| H | 2.84246600  | 2.36211100  | 0.00072000  |
| H | 0.43871200  | 1.82438300  | -0.00146900 |
| H | 1.39901300  | -2.35813800 | -0.00055100 |
| H | 3.79556100  | -1.81558200 | 0.00157400  |
| N | -0.59748500 | -0.69305700 | -0.00248700 |
| H | -0.77999600 | -1.68462200 | -0.00117900 |
| C | -1.71332100 | 0.09742400  | -0.00081800 |
| O | -1.75486700 | 1.30620900  | -0.00064700 |
| O | -2.81313900 | -0.70437300 | 0.00097700  |
| C | -4.07286900 | -0.01386500 | 0.00160200  |
| H | -4.16870400 | 0.61207100  | 0.88919500  |
| H | -4.17024900 | 0.61080100  | -0.88672600 |
| H | -4.82976700 | -0.79384000 | 0.00282400  |

## MPCcis

$$E_{\text{DLPNO-CCSD(T)/aug-cc-pVTZ}} = -514.663607655099$$

|   |             |             |             |
|---|-------------|-------------|-------------|
| C | -3.28676700 | 0.64066600  | 0.06607100  |
| C | -2.19366100 | 1.46702400  | -0.16855300 |
| C | -0.90429400 | 0.95212100  | -0.25204500 |
| C | -0.69390700 | -0.41944400 | -0.08419500 |
| C | -1.79571000 | -1.25169800 | 0.15191600  |
| C | -3.07769900 | -0.72623100 | 0.22233100  |
| H | -4.28558300 | 1.05356100  | 0.12547000  |
| H | -2.33978700 | 2.53258800  | -0.29816800 |
| H | -0.06991500 | 1.60691200  | -0.44128100 |
| H | -1.64307800 | -2.31704700 | 0.28638000  |
| H | -3.91423600 | -1.38929000 | 0.40575000  |
| N | 0.56778700  | -1.04547400 | -0.17630700 |
| H | 0.55243100  | -2.05107400 | -0.25215900 |
| C | 1.85547100  | -0.58223600 | -0.06828400 |
| O | 2.81889600  | -1.31597500 | -0.12930200 |
| O | 1.92903300  | 0.75194000  | 0.11261600  |
| C | 3.26259000  | 1.27665600  | 0.24814900  |
| H | 3.76093200  | 0.83717800  | 1.11191900  |
| H | 3.84898200  | 1.06909600  | -0.64666900 |
| H | 3.13619000  | 2.34753300  | 0.38405600  |

## Urethane Formation, TS with 4-ring

$$E_{\text{DLPNO-CCSD(T)/aug-cc-pVTZ}} = -514.5811796$$

|   |             |             |             |
|---|-------------|-------------|-------------|
| C | 3.48556500  | 0.05520000  | -0.13635500 |
| C | 2.67004400  | 1.18299800  | -0.13981000 |
| C | 1.28885900  | 1.06302800  | -0.03936800 |
| C | 0.70863600  | -0.20670700 | 0.06838800  |
| C | 1.52764200  | -1.33954700 | 0.07212100  |
| C | 2.90586400  | -1.20628000 | -0.02945600 |
| H | 4.56047000  | 0.15790400  | -0.21498000 |
| H | 3.11031900  | 2.16939500  | -0.22204000 |
| H | 0.66220400  | 1.94476400  | -0.04349800 |
| H | 1.07051300  | -2.31747500 | 0.15752600  |
| H | 3.52931100  | -2.09212300 | -0.02445900 |
| N | -0.67743700 | -0.40747200 | 0.17000500  |
| H | -1.78282500 | -1.18629300 | 0.29409000  |
| C | -1.58920300 | 0.52415800  | 0.20534000  |
| O | -1.84752700 | 1.67816600  | 0.12733000  |
| O | -2.79082000 | -0.58387300 | 0.43636500  |
| C | -3.83206500 | -0.56114500 | -0.54891900 |
| H | -4.26048600 | 0.44150300  | -0.56213800 |
| H | -3.43985700 | -0.80695100 | -1.53984700 |
| H | -4.59287000 | -1.28299600 | -0.25589500 |

Urethane Formation, TS with 6-ring, Conformer 1

$E_{\text{DLPNO-CCSD(T)/aug-cc-pVTZ}} = -630.1843287$

|   |             |             |             |
|---|-------------|-------------|-------------|
| C | 3.95552900  | 0.12930200  | -0.03807600 |
| C | 3.31453100  | -1.08734100 | 0.17111100  |
| C | 1.92642600  | -1.17631600 | 0.17878400  |
| C | 1.14940500  | -0.02667300 | -0.02432900 |
| C | 1.80235800  | 1.19623400  | -0.23377400 |
| C | 3.18756300  | 1.27299500  | -0.24148800 |
| H | 5.03679600  | 0.18653700  | -0.04309600 |
| H | 3.89949500  | -1.98561400 | 0.32992500  |
| H | 1.44555300  | -2.12981300 | 0.33854400  |
| H | 1.20702700  | 2.08753300  | -0.39431200 |
| H | 3.66875600  | 2.22955400  | -0.40715800 |
| N | -0.25805200 | 0.00786300  | -0.02896400 |
| H | -1.11537300 | 1.23145900  | -0.34940000 |
| C | -0.97906200 | -1.06474000 | 0.10741000  |
| O | -0.87426400 | -2.25383300 | 0.21797300  |
| O | -2.49320400 | -0.55610600 | 0.14547300  |
| C | -3.48261200 | -1.45945600 | -0.37517300 |
| H | -3.48776400 | -1.43373800 | -1.46664000 |
| H | -3.23929700 | -2.46084200 | -0.02860200 |
| H | -4.44903600 | -1.14968200 | 0.01889900  |
| C | -2.25268700 | 2.68682000  | 0.56827900  |
| H | -1.64767600 | 3.56708800  | 0.34694700  |
| H | -1.97077600 | 2.29128400  | 1.54854900  |
| H | -3.30349100 | 2.97394200  | 0.58156600  |
| O | -2.06363600 | 1.70506900  | -0.46049100 |
| H | -2.51772800 | 0.55125100  | -0.17257400 |

Urethane Formation, TS with 6-ring, Conformer 2

$E_{\text{DLPNO-CCSD(T)/aug-cc-pVTZ}} = -630.1836063$

|   |             |             |             |
|---|-------------|-------------|-------------|
| C | 3.95084500  | 0.10907600  | 0.12158900  |
| C | 3.28467100  | -1.09718200 | 0.31150000  |
| C | 1.90119200  | -1.18043600 | 0.19337100  |
| C | 1.15490800  | -0.03584900 | -0.12259900 |
| C | 1.83330000  | 1.17594500  | -0.31571800 |
| C | 3.21352500  | 1.24737500  | -0.19456500 |
| H | 5.02824800  | 0.16198200  | 0.21568300  |
| H | 3.84595100  | -1.99137300 | 0.55585500  |
| H | 1.40021000  | -2.12500800 | 0.34429300  |
| H | 1.26214100  | 2.06054100  | -0.57238500 |
| H | 3.71515500  | 2.19503600  | -0.35049400 |
| N | -0.24527200 | 0.00428000  | -0.26167800 |
| H | -1.08603000 | 1.27444700  | -0.42675200 |
| C | -0.98781800 | -1.05365400 | -0.12911100 |
| O | -0.91496600 | -2.22182900 | 0.13242200  |
| O | -2.47292800 | -0.56374900 | -0.44223100 |
| C | -3.54596300 | -1.32026000 | 0.13831200  |
| H | -3.28954600 | -2.37459600 | 0.07044400  |
| H | -3.69202600 | -1.04371800 | 1.18486000  |
| H | -4.44377000 | -1.11270300 | -0.44135400 |
| C | -2.20889700 | 2.52921300  | 0.75631500  |
| H | -1.59567100 | 3.43039500  | 0.71793300  |
| H | -1.92999600 | 1.94445400  | 1.63864100  |
| H | -3.25718900 | 2.81753200  | 0.82763600  |
| O | -2.02658200 | 1.77327300  | -0.44802300 |
| H | -2.49935200 | 0.58613600  | -0.42453100 |



Urethane Formation, TS with 8-ring, Conformer 1

$E_{\text{DLPNO-CCSD(T)/aug-cc-pVTZ}} = -745.770201$

|   |             |             |             |
|---|-------------|-------------|-------------|
| C | 4.22467600  | 0.20026000  | 0.29701000  |
| C | 3.69829500  | -1.05828000 | 0.02586400  |
| C | 2.32896600  | -1.24762400 | -0.13045800 |
| C | 1.44824100  | -0.16002400 | -0.01561600 |
| C | 1.98896300  | 1.10717300  | 0.25845400  |
| C | 3.35687400  | 1.28319800  | 0.41178200  |
| H | 5.29238800  | 0.33594600  | 0.41672200  |
| H | 4.36005300  | -1.91165100 | -0.06724500 |
| H | 1.94057500  | -2.23273600 | -0.33904400 |
| H | 1.31934900  | 1.95368300  | 0.35089700  |
| H | 3.74615300  | 2.27223500  | 0.62354200  |
| N | 0.04594900  | -0.22313800 | -0.15987100 |
| H | -2.28279700 | 1.56482100  | 0.30979100  |
| C | -0.56472700 | -1.36479100 | -0.27655700 |
| O | -0.32034600 | -2.54411500 | -0.33236000 |
| O | -2.08937200 | -1.04634900 | -0.35875400 |
| C | -2.96562300 | -2.18742200 | -0.39022800 |
| H | -2.85885900 | -2.78261000 | 0.51659700  |
| H | -3.97851900 | -1.79771900 | -0.48006500 |
| H | -2.71732500 | -2.80091200 | -1.25219800 |
| C | -2.29306200 | 0.91566800  | 2.23293100  |
| H | -2.52698700 | 1.88112600  | 2.67929400  |
| H | -1.21422700 | 0.74983600  | 2.23372100  |
| H | -2.79196800 | 0.12728000  | 2.79348700  |
| O | -2.80533600 | 0.88553600  | 0.88134700  |
| H | -2.46488700 | -0.13762600 | 0.29299800  |
| C | -1.30541100 | 2.50603400  | -1.90153200 |
| H | -0.32823900 | 2.70134000  | -2.35088700 |
| H | -1.81742400 | 1.73664000  | -2.48932200 |
| H | -1.89332400 | 3.42342500  | -1.92958700 |
| O | -1.15705100 | 2.11401400  | -0.53798100 |
| H | -0.63190600 | 1.24104400  | -0.47751800 |

Urethane Formation, TS with 8-ring, Conformer 2

$E_{\text{DLPNO-CCSD(T)/aug-cc-pVTZ}} = -745.7684745$

|   |             |             |             |
|---|-------------|-------------|-------------|
| C | 4.14738200  | 0.01885900  | 0.34218900  |
| C | 3.60310600  | -1.19402800 | -0.06893700 |
| C | 2.23130600  | -1.34780200 | -0.23821100 |
| C | 1.36340800  | -0.27042200 | 0.00388900  |
| C | 1.92390900  | 0.94760100  | 0.42123400  |
| C | 3.29419100  | 1.09128500  | 0.58785500  |
| H | 5.21716800  | 0.12651900  | 0.47095300  |
| H | 4.25410800  | -2.03870600 | -0.26279400 |
| H | 1.82738300  | -2.29863900 | -0.55122000 |
| H | 1.26283600  | 1.78124700  | 0.62469100  |
| H | 3.69651400  | 2.04343700  | 0.91385500  |
| N | -0.03417000 | -0.29286200 | -0.16120600 |
| H | -2.30018800 | 1.61714600  | 0.00235400  |
| C | -0.67842700 | -1.42523100 | -0.22754900 |
| O | -0.44743000 | -2.61068800 | -0.21289100 |
| O | -2.16852400 | -1.08120400 | -0.33634800 |
| C | -3.08062800 | -2.19277700 | -0.33383200 |
| H | -3.00817800 | -2.74955700 | 0.60034200  |
| H | -4.07758900 | -1.77293200 | -0.45814400 |
| H | -2.84125300 | -2.85268300 | -1.16379500 |
| C | -2.29602600 | 1.16287700  | 1.98185700  |
| H | -2.50574300 | 2.17235800  | 2.33257600  |
| H | -1.22247100 | 0.96806500  | 1.98368600  |
| H | -2.80656600 | 0.44525400  | 2.62086100  |
| O | -2.82709400 | 1.01289600  | 0.64430400  |
| H | -2.53284800 | -0.05965900 | 0.18998100  |
| C | -0.47588600 | 3.08694100  | -1.38677000 |
| H | 0.07310200  | 3.50589800  | -0.53662000 |
| H | 0.23838400  | 2.83968700  | -2.17580900 |
| H | -1.16753600 | 3.84051600  | -1.76381400 |
| O | -1.23254200 | 1.93931400  | -1.01999600 |
| H | -0.65723500 | 1.13572100  | -0.78958200 |

Urethane Formation, TS with 8-ring, Conformer 3

$E_{\text{DLPNO-CCSD(T)/aug-cc-pVTZ}} = -745.7684534$

|   |             |             |             |
|---|-------------|-------------|-------------|
| C | -4.12303100 | -0.19191300 | 0.35427600  |
| C | -3.32504900 | -1.14677900 | 0.97849700  |
| C | -1.96010400 | -1.21354200 | 0.72526100  |
| C | -1.35987700 | -0.31272100 | -0.16701200 |
| C | -2.17270100 | 0.63983200  | -0.79663100 |
| C | -3.53638700 | 0.69920100  | -0.53953300 |
| H | -5.18621100 | -0.14843300 | 0.55519100  |
| H | -3.76909800 | -1.85242500 | 1.67101400  |
| H | -1.35719800 | -1.97168300 | 1.20431500  |
| H | -1.72313100 | 1.32091300  | -1.50862300 |
| H | -4.14327300 | 1.44147600  | -1.04470100 |
| N | 0.02550700  | -0.25975500 | -0.43022800 |
| H | 2.20280100  | 1.69681000  | 0.02985900  |
| C | 0.72721600  | -1.35509600 | -0.38239900 |
| O | 0.56269500  | -2.53847200 | -0.21319500 |
| O | 2.20277400  | -0.95734800 | -0.62913500 |
| C | 3.14720300  | -2.04398700 | -0.63873100 |
| H | 2.89101300  | -2.72801200 | -1.44358500 |
| H | 4.12519200  | -1.59939800 | -0.81609800 |
| H | 3.12931300  | -2.58210600 | 0.30863400  |
| C | 2.46031700  | 0.98409600  | 1.91522400  |
| H | 1.40229900  | 0.72879500  | 2.00771200  |
| H | 2.65805200  | 1.94584100  | 2.38728800  |
| H | 3.06718200  | 0.21830200  | 2.39483700  |
| O | 2.84558900  | 1.05075400  | 0.52610000  |
| H | 2.55909800  | 0.01056200  | -0.04563400 |
| C | 0.18479700  | 3.21337300  | -0.26422100 |
| H | -0.56977500 | 3.47799000  | -1.00872000 |
| H | -0.32540500 | 2.90527300  | 0.65369700  |
| H | 0.79343600  | 4.09453300  | -0.05924900 |
| O | 1.04397600  | 2.18762600  | -0.76155000 |
| H | 0.57259000  | 1.28457400  | -0.76048400 |

TS of Urethane Cleavage

|   |                                                       |             |             |
|---|-------------------------------------------------------|-------------|-------------|
|   | $E_{\text{DLPNO-CCSD(T)/aug-cc-pVTZ}} = -1029.298282$ |             |             |
| C | 3.96228300                                            | -2.27843500 | -0.82919000 |
| C | 4.38936000                                            | -1.20477200 | -0.05347400 |
| C | 3.54436400                                            | -0.13434400 | 0.21797900  |
| C | 2.23602900                                            | -0.11910600 | -0.29086000 |
| C | 1.81710300                                            | -1.20367400 | -1.07674500 |
| C | 2.66747400                                            | -2.26823000 | -1.34065900 |
| H | 4.62826900                                            | -3.10721000 | -1.03520200 |
| H | 5.39573300                                            | -1.19611900 | 0.34909100  |
| H | 3.89490500                                            | 0.69530900  | 0.81359700  |
| H | 0.81330000                                            | -1.20058900 | -1.48241800 |
| H | 2.31603300                                            | -3.09246800 | -1.95018600 |
| N | 1.28324300                                            | 0.88405900  | -0.03111700 |
| H | -0.25764000                                           | 0.42260000  | 0.00290600  |
| C | 1.65237100                                            | 2.08192800  | 0.33226900  |
| O | 2.67371300                                            | 2.69495600  | 0.53209700  |
| O | 0.37907500                                            | 2.88805400  | 0.54865400  |
| C | 0.55196700                                            | 4.30000000  | 0.76211500  |
| H | 1.21082300                                            | 4.45470700  | 1.61244400  |
| H | 0.98298500                                            | 4.77201100  | -0.12080100 |
| H | -0.43871200                                           | 4.70246200  | 0.96758900  |
| C | -2.00891800                                           | -3.89490900 | 0.92798900  |
| C | -2.88660400                                           | -3.24630200 | 0.06618700  |
| C | -2.69704000                                           | -1.91005400 | -0.27084100 |
| C | -1.62128600                                           | -1.20849400 | 0.27573800  |
| C | -0.73343800                                           | -1.85988300 | 1.13672600  |
| C | -0.92817100                                           | -3.19554300 | 1.45729700  |
| H | -2.16164900                                           | -4.93673700 | 1.17995400  |
| H | -3.72445700                                           | -3.78418300 | -0.36028300 |
| H | -3.37600000                                           | -1.42197800 | -0.95208000 |
| H | 0.11393100                                            | -1.31762700 | 1.53546500  |
| H | -0.22895000                                           | -3.69000300 | 2.11970700  |
| N | -1.31049000                                           | 0.14172800  | -0.03418300 |
| H | -0.63060100                                           | 2.57253800  | -0.04504000 |
| C | -2.11014700                                           | 1.13294100  | -0.37077800 |
| O | -1.69251900                                           | 2.32533700  | -0.52398800 |
| O | -3.39812500                                           | 0.87619000  | -0.55719900 |
| C | -4.26565900                                           | 1.99473300  | -0.84752600 |
| H | -4.24167100                                           | 2.71646100  | -0.03227000 |
| H | -3.96457000                                           | 2.47863300  | -1.77522500 |
| H | -5.25628400                                           | 1.56025500  | -0.94404600 |

## Experimental Literature Data and Calculated Rate Constants for Urethane Formation

| $\log(k^{\text{pred}}/\text{m}^3 \text{mol}^{-1} \text{s}^{-1})$ | $\log(k^{\text{exp}}/\text{m}^3 \text{mol}^{-1} \text{s}^{-1})$ | $T$ in °C | Solvent              | Ref. exp. data |
|------------------------------------------------------------------|-----------------------------------------------------------------|-----------|----------------------|----------------|
| -6,271330907                                                     | -6,926892902                                                    | 20        | benzene              | 5              |
| -6,045348257                                                     | -6,93305321                                                     | 20        | toluene              | 5              |
| -6,998150653                                                     | -7,346787486                                                    | 20        | nitrobenzene         | 5              |
| -7,477582593                                                     | -7,547702329                                                    | 20        | di-n-butyl ether     | 5              |
| -7,808791391                                                     | -7,736758565                                                    | 20        | n-butyl acetate      | 5              |
| -8,961835761                                                     | -8,286789557                                                    | 20        | butanone             | 5              |
| -9,350468534                                                     | -8,547702329                                                    | 20        | dioxane              | 5              |
| -9,029070389                                                     | -8,77815125                                                     | 20        | acetonitrile         | 5              |
| -5,196439002                                                     | -6,187086643                                                    | 25        | cyclohexane          | 6              |
| -5,0032155                                                       | -6,187086643                                                    | 25        | n-heptane            | 6              |
| -5,508431932                                                     | -6,522878745                                                    | 25        | carbon tetrachloride | 6              |
| -5,891189245                                                     | -6,736758565                                                    | 25        | xylene               | 6              |
| -6,094184588                                                     | -6,814363423                                                    | 25        | toluene              | 6              |
| -6,287563836                                                     | -6,875061263                                                    | 25        | chlorobenzene        | 6              |
| -6,318570936                                                     | -7,014723257                                                    | 25        | benzene              | 6              |
| -7,784893761                                                     | -7,315753252                                                    | 25        | chloroform           | 6              |
| -6,978440577                                                     | -7,346787486                                                    | 25        | 1,2-dichloroethane   | 6              |
| -7,564475883                                                     | -7,455931956                                                    | 25        | di-n-butyl ether     | 6              |
| -7,162829843                                                     | -7,522878745                                                    | 25        | nitrobenzene         | 6              |
| -9,074679853                                                     | -8,259637311                                                    | 25        | methyl ethyl ketone  | 6              |
| -8,09733086                                                      | -8,363177902                                                    | 25        | n-butyl acetate      | 6              |
| -8,61372721                                                      | -8,522878745                                                    | 25        | ethyl acetate        | 6              |
| -9,886316528                                                     | -8,547702329                                                    | 25        | tetrahydrofuran      | 6              |
| -9,167321277                                                     | -8,602059991                                                    | 25        | acetonitrile         | 6              |
| -9,475661085                                                     | -8,875061263                                                    | 25        | dioxane              | 6              |
| -6,207577644                                                     | -6,3400838                                                      | 25        | excess alcohol       | 7              |
| -5,770930317                                                     | -6,358525889                                                    | 25        | xylene               | 8              |

The predicted rate constants  $k^{\text{pred}}$  were evaluated at the reaction mixture compositions used in the experiments.

## Arrhenius Plots

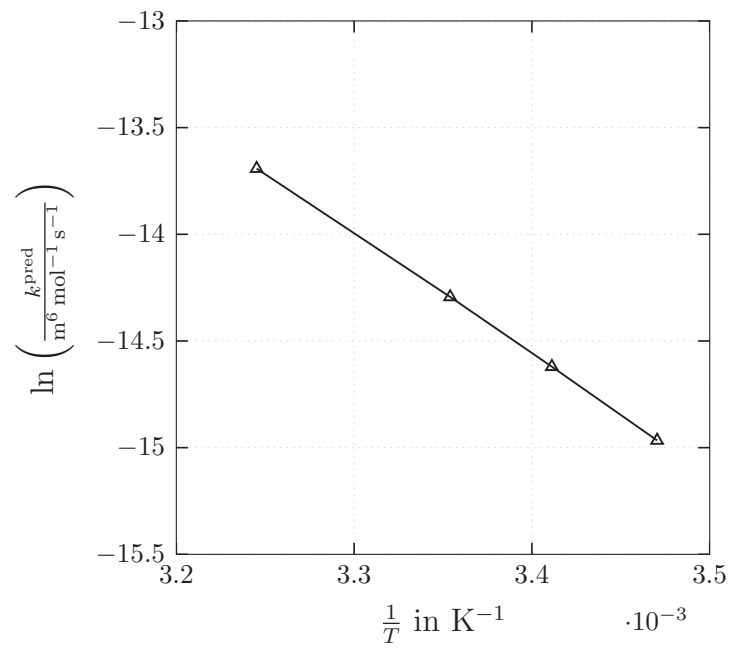

Figure 2: Arrhenius plot for the urethane formation in excess alcohol. The triangles show the predicted reaction rate constants. The solid line shows the fit of the Arrhenius equation.

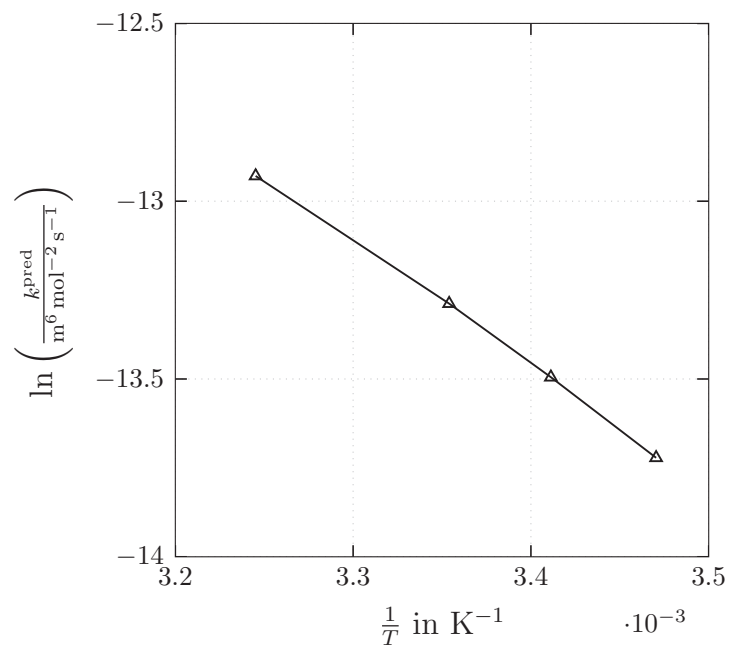

Figure 3: Arrhenius plot for the urethane formation in xylene. The triangles show the predicted reaction rate constants. The solid line shows the fit of the Arrhenius equation.

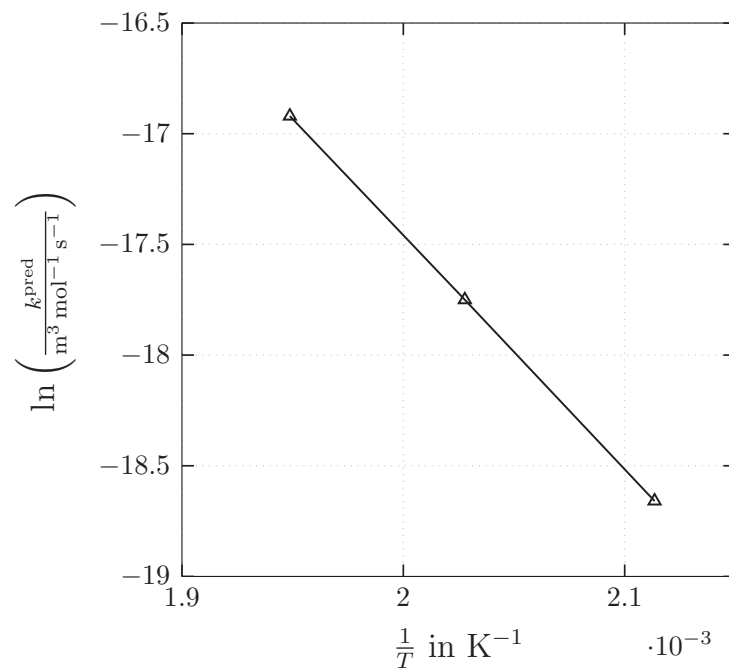

Figure 4: Arrhenius plot for the MPC cleavage reaction in diphenyl ether. The triangles show the predicted reaction rate constants. The solid line shows the fit of the Arrhenius equation.

## References

- (1) Klamt, A. Conductor-like screening model for real solvents: a new approach to the quantitative calculation of solvation phenomena. *The Journal of Physical Chemistry* **1995**, *99*, 2224–2235.
- (2) Klamt, A.; Jonas, V.; Bürger, T.; Lohrenz, J. C. Refinement and parametrization of COSMO-RS. *The Journal of Physical Chemistry A* **1998**, *102*, 5074–5085.
- (3) Klamt, A.; Eckert, F.; Arlt, W. COSMO-RS: an alternative to simulation for calculating thermodynamic properties of liquid mixtures. *Annual Review of Chemical and Biomolecular Engineering* **2010**, *1*, 101–122.
- (4) Fernández-Ramos, A.; Ellingson, B. A.; Meana-Pañeda, R.; Marques, J. M.; Truhlar, D. G. Symmetry numbers and chemical reaction rates. *Theoretical Chemistry Accounts* **2007**, *118*, 813–826.
- (5) Ephraim, S.; Woodward, A.; Mesrobian, R. Kinetic Studies of the Reaction of Phenyl Isocyanate with Alcohols in Various Solvents. *Journal of the American Chemical Society* **1958**, *80*, 1326–1328.
- (6) Oberth, A. E.; Bruenner, R. S. Effect of hydrogen bonding on the kinetics of the urethane reaction. *The Journal of Physical Chemistry* **1968**, *72*, 845–855.
- (7) Lovering, E. G.; Laidler, K. J. Kinetic studies of some alcohol–isocyanate reactions. *Canadian Journal of Chemistry* **1962**, *40*, 31–36.
- (8) Dyer, E.; Taylor, H. A.; Mason, S. J.; Samson, J. The Rates of Reaction of Isocyanates with Alcohols. I. Phenyl Isocyanate with 1-and 2-Butanol. *Journal of the American Chemical Society* **1949**, *71*, 4106–4109.
